# Supplementary figures and images for: Helicobacter pylori Evolution: Lineage- Specific Adaptations in Homologs of Eukaryotic Sel1-Like Genes
Source: PLOS journal article supplement (doi:10.1371/journal.pcbi.0030151), 2007-08-07

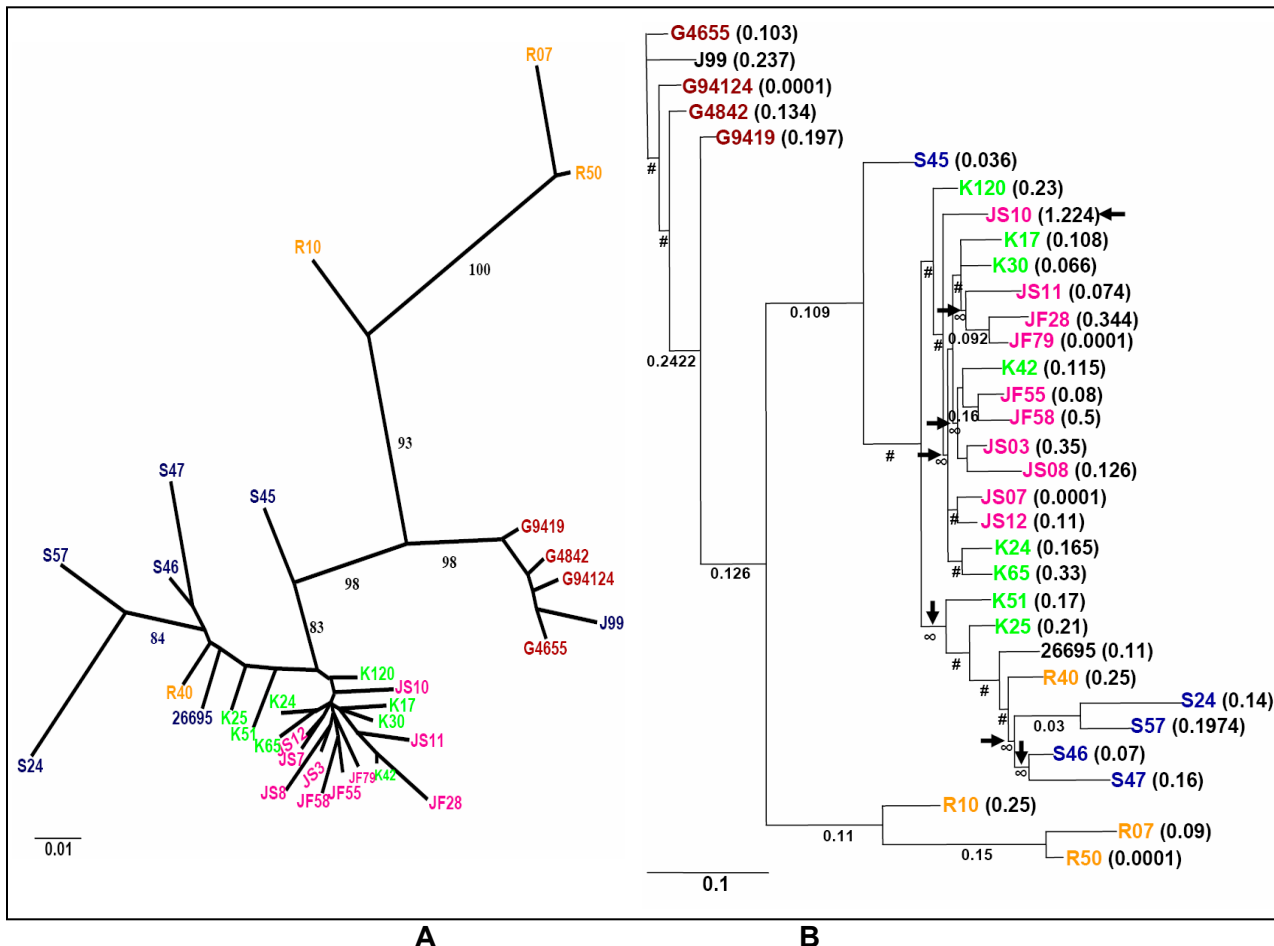

Supplement: S4 (10.1371/journal.pcbi.0030151.s004) [file journal.pcbi.0030151.s004]

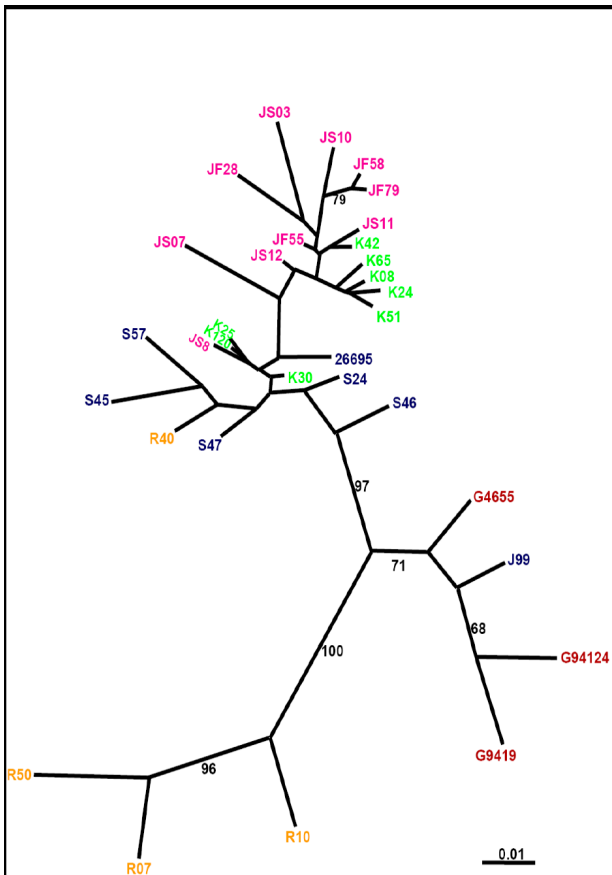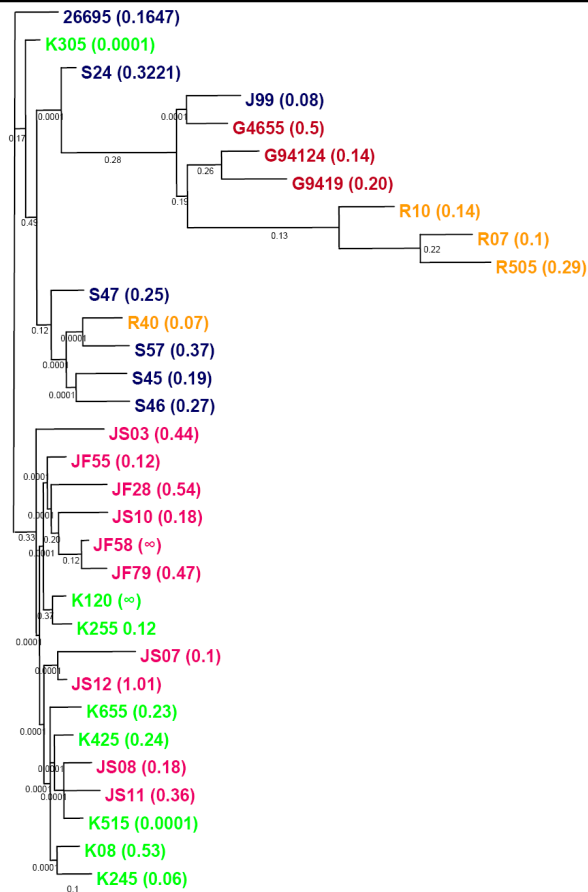

Supplement: S5 (10.1371/journal.pcbi.0030151.s005) [file journal.pcbi.0030151.s005]

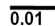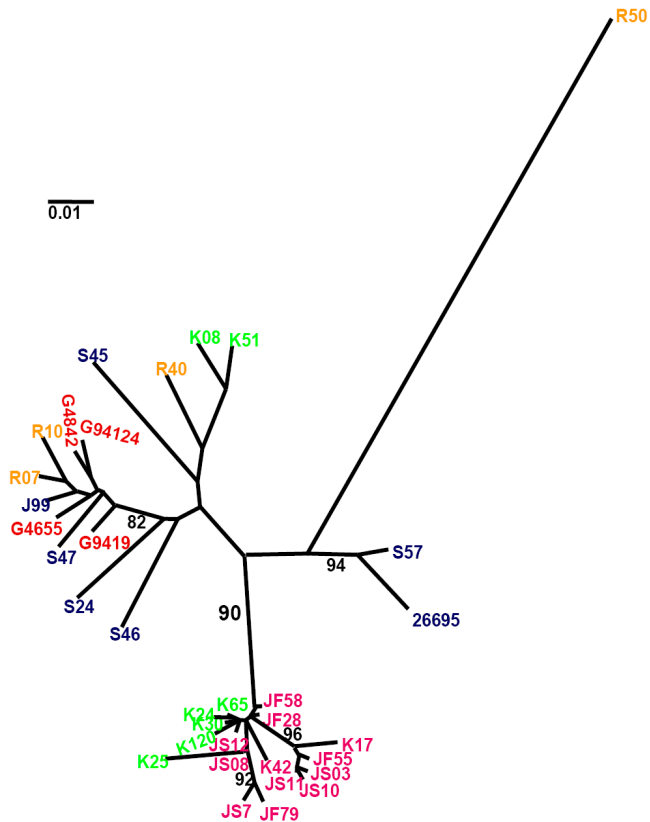

A

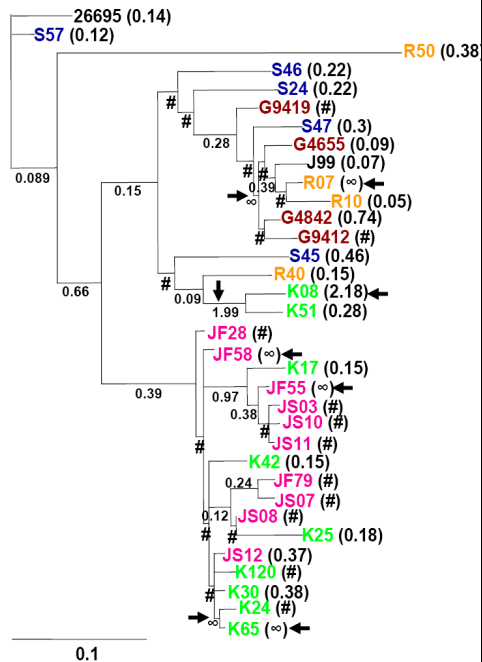

B

Supplement: S6 (10.1371/journal.pcbi.0030151.s006) [file journal.pcbi.0030151.s006]

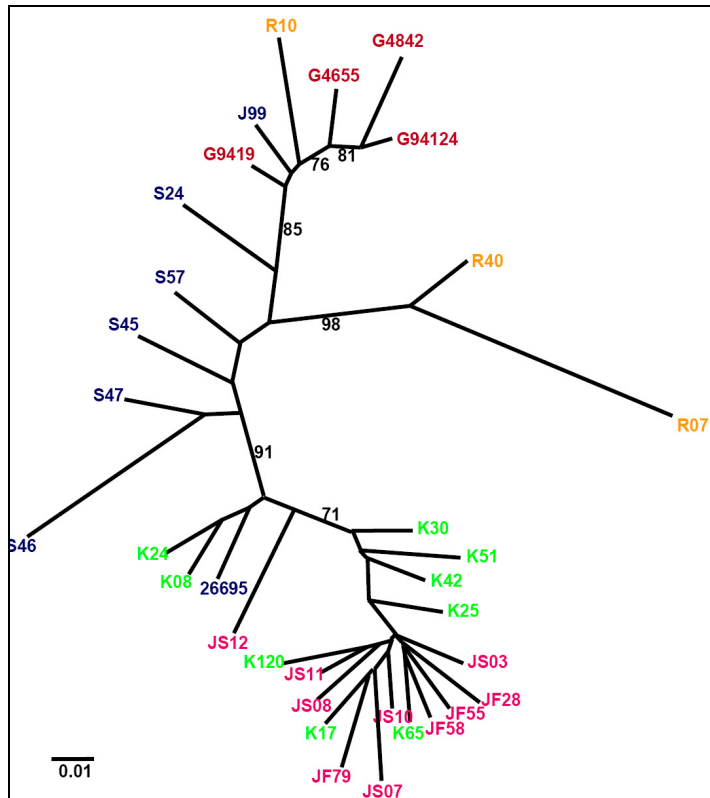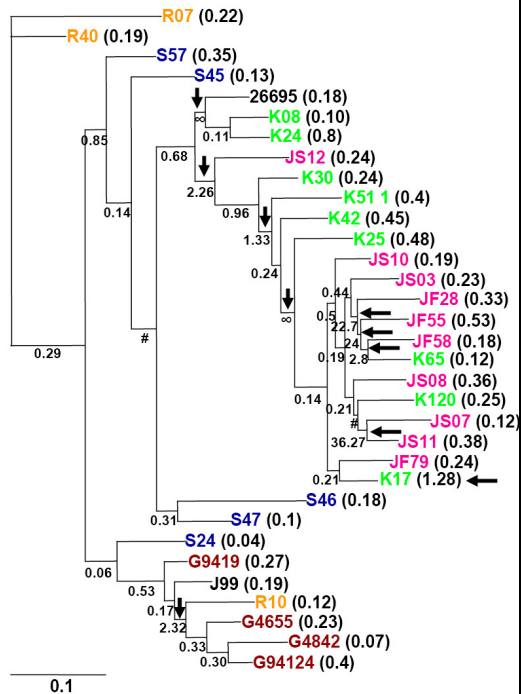

Supplement: S7 (10.1371/journal.pcbi.0030151.s007) [file journal.pcbi.0030151.s007]

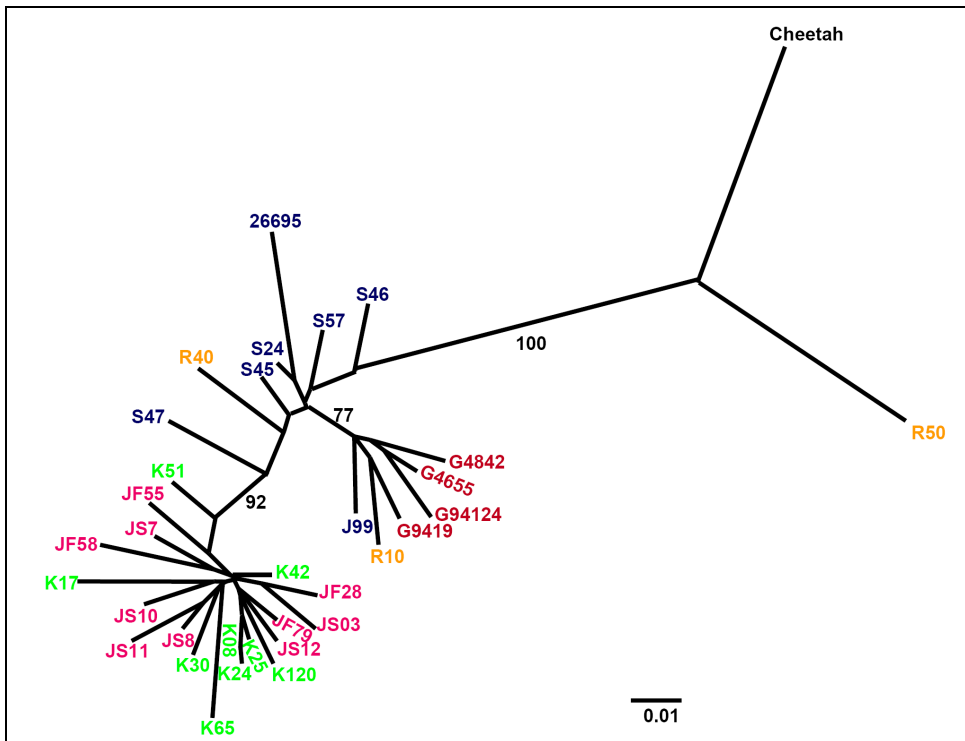

Supplement: S8 (10.1371/journal.pcbi.0030151.s008) [file journal.pcbi.0030151.s008]
